# Supplementary material
Source: PubMed Central journal article supplement (PMC3139566)
Supplement: NIHMS307685-supplement-1_si_001.pdf [file NIHMS307685-supplement-1_si_001.pdf]

Supplementary Information Mulvihill et al., 2011

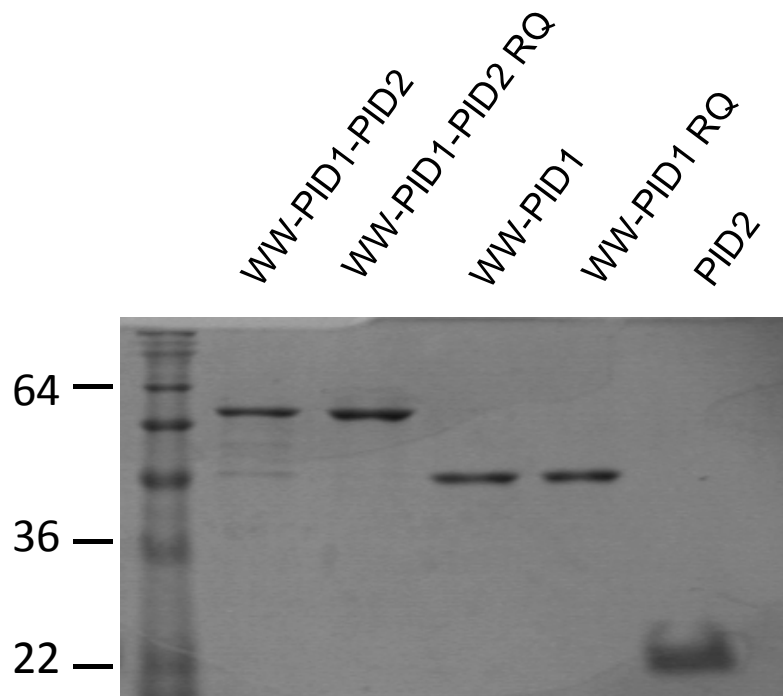

**Figure S1.** Fe65 WW-PID1-PID2 236-662, WW-PID1-PID2 R451Q 236-662, WW-PID1 236-512, WW-PID1 R451Q 236-512, and PID2 536-662 (1-2.5  $\mu$ M) visualized on a 13% SDS-PAGE gel stained with Commassie.
